# Supplementary material for: Spread it on thick? Relative effects of condiment addition and slice thickness on eating rate of bread
Source: Royal Society of Chemistry journal article supplement (doi:10.1039/d3fo05686d), 2024-01-01
Supplement: d3fo05686d1.pdf [file d3fo05686d1.pdf]

**Supplement Table 1:** Means  $\pm$  SD for instrumental texture attributes, water absorption capacity (WAC), and water content for Wholewheat = W and Sourdough = S breads, in different slice thicknesses without margarine.

| N = 3                | W1_M0           | W2_M0           | W4_M0           | S1_M0           | S2_M0           | S4_M0           | P <sub>bread</sub> | P <sub>thickness</sub> | P <sub>bread x thickness</sub> |
|----------------------|-----------------|-----------------|-----------------|-----------------|-----------------|-----------------|--------------------|------------------------|--------------------------------|
| Hardness [g]         | 374 $\pm$ 119   | 400. $\pm$ 116  | 411 $\pm$ 118   | 915 $\pm$ 67    | 839 $\pm$ 100   | 958 $\pm$ 52    | <0.001             | 0.78                   | 0.17                           |
| Chewiness [g]        | 315 $\pm$ 79    | 306 $\pm$ 78    | 307 $\pm$ 77    | 682 $\pm$ 54    | 629 $\pm$ 69    | 693 $\pm$ 38    | <0.001             | 0.71                   | 0.30                           |
| Springiness [-]      | 0.96 $\pm$ 0.0  | 0.96 $\pm$ 0.0  | 0.94 $\pm$ 0.0  | 0.95 $\pm$ 0.0  | 0.95 $\pm$ 0.0  | 0.95 $\pm$ 0.0  | 0.29               | 0.03                   | 0.04                           |
| Cohesiveness [-]     | 0.89 $\pm$ 0.1  | 0.81 $\pm$ 0.0  | 0.81 $\pm$ 0.1  | 0.79 $\pm$ 0.0  | 0.79 $\pm$ 0.0  | 0.76 $\pm$ 0.0  | 0.02               | 0.17                   | 0.09.                          |
| Adhesiveness[g*sec]  | -0.09 $\pm$ 0.2 | -0.19 $\pm$ 0.3 | -1.17 $\pm$ 1.3 | -10.3 $\pm$ 1.7 | -5.69 $\pm$ 4.2 | -4.16 $\pm$ 2.1 | <0.001             | 0.07                   | 0.01                           |
| WAC [g/g]            | 3.15 $\pm$ 0.2  | 2.99 $\pm$ 0.1  | 2.58 $\pm$ 0.13 | 1.65 $\pm$ 0.1  | 1.3 $\pm$ 0.1   | 1.18 $\pm$ 0.1  | <0.001             | 0.27                   | 0.41                           |
| Water content [w/w%] | 48.7 $\pm$ 0.5  | 47.9 $\pm$ 0.3  | 48.1 $\pm$ 0.14 | 48.2 $\pm$ 0.3  | 47.2 $\pm$ 1.6  | 47.7 $\pm$ 0.3  | 0.91               | 0.90                   | 0.94                           |

**Supplement Table 2:** Means  $\pm$  SEM of sensory texture attributes of WB differing in thickness and addition of margarine.

| N=30         | W1_M0      | W1_M2      | W1_M4      | W2_M0      | W2_M2      | W2_M4      | W4_M0      | W4_M2      | W4_M4      | P <sub>thickness</sub> | P <sub>margarine</sub> | P <sub>thickness x mar</sub> |
|--------------|------------|------------|------------|------------|------------|------------|------------|------------|------------|------------------------|------------------------|------------------------------|
| Hardness     | 24 $\pm$ 3 | 19 $\pm$ 4 | 18 $\pm$ 3 | 30 $\pm$ 4 | 30 $\pm$ 4 | 24 $\pm$ 3 | 43 $\pm$ 4 | 37 $\pm$ 4 | 29 $\pm$ 4 | <0.001                 | 0.007                  | 0.49                         |
| Denseness    | 31 $\pm$ 4 | 23 $\pm$ 4 | 20 $\pm$ 4 | 36 $\pm$ 4 | 28 $\pm$ 3 | 31 $\pm$ 4 | 55 $\pm$ 5 | 39 $\pm$ 4 | 34 $\pm$ 4 | <0.001                 | <0.001                 | 0.09                         |
| Adhesiveness | 45 $\pm$ 4 | 36 $\pm$ 4 | 29 $\pm$ 4 | 52 $\pm$ 4 | 38 $\pm$ 4 | 35 $\pm$ 3 | 55 $\pm$ 4 | 45 $\pm$ 4 | 40 $\pm$ 4 | 0.002                  | <0.001                 | 0.90                         |
| Chewiness    | 40 $\pm$ 3 | 25 $\pm$ 4 | 22 $\pm$ 3 | 54 $\pm$ 4 | 40 $\pm$ 4 | 33 $\pm$ 4 | 69 $\pm$ 4 | 52 $\pm$ 4 | 49 $\pm$ 4 | <0.001                 | <0.001                 | 0.93                         |
| Dryness      | 60 $\pm$ 4 | 28 $\pm$ 4 | 29 $\pm$ 5 | 70 $\pm$ 3 | 39 $\pm$ 5 | 30 $\pm$ 5 | 68 $\pm$ 4 | 45 $\pm$ 4 | 37 $\pm$ 4 | 0.006                  | <0.001                 | 0.32                         |
| Crumbliness  | 42 $\pm$ 5 | 32 $\pm$ 4 | 25 $\pm$ 4 | 41 $\pm$ 4 | 29 $\pm$ 4 | 35 $\pm$ 5 | 53 $\pm$ 4 | 38 $\pm$ 4 | 40 $\pm$ 4 | <0.001                 | <0.001                 | 0.21                         |

**Supplement Table 3:** Means  $\pm$  SEM of sensory texture attributes of SB differing in thickness and addition of margarine.

| N=30         | S1_M0      | S1_M2      | S1_M4      | S2_M0      | S2_M2      | S2_M4      | S4_M0      | S4_M2      | S4_M4      | P <sub>thickness</sub> | P <sub>margarine</sub> | P <sub>thickness x mar</sub> |
|--------------|------------|------------|------------|------------|------------|------------|------------|------------|------------|------------------------|------------------------|------------------------------|
| Hardness     | 45 $\pm$ 4 | 33 $\pm$ 4 | 30 $\pm$ 4 | 47 $\pm$ 3 | 47 $\pm$ 4 | 42 $\pm$ 4 | 57 $\pm$ 4 | 49 $\pm$ 5 | 46 $\pm$ 4 | <0.001                 | 0.002                  | 0.23                         |
| Denseness    | 56 $\pm$ 4 | 50 $\pm$ 4 | 43 $\pm$ 5 | 60 $\pm$ 4 | 61 $\pm$ 4 | 57 $\pm$ 4 | 69 $\pm$ 4 | 62 $\pm$ 5 | 61 $\pm$ 4 | <0.001                 | 0.021                  | 0.51                         |
| Adhesiveness | 58 $\pm$ 4 | 39 $\pm$ 4 | 34 $\pm$ 4 | 56 $\pm$ 4 | 49 $\pm$ 4 | 34 $\pm$ 3 | 57 $\pm$ 4 | 47 $\pm$ 5 | 45 $\pm$ 4 | 0.041                  | <0.001                 | 0.12                         |
| Chewiness    | 57 $\pm$ 4 | 39 $\pm$ 4 | 36 $\pm$ 3 | 66 $\pm$ 4 | 59 $\pm$ 3 | 50 $\pm$ 4 | 78 $\pm$ 3 | 70 $\pm$ 4 | 64 $\pm$ 4 | <0.001                 | <0.001                 | 0.27                         |
| Dryness      | 52 $\pm$ 5 | 26 $\pm$ 4 | 23 $\pm$ 4 | 50 $\pm$ 5 | 36 $\pm$ 4 | 25 $\pm$ 3 | 51 $\pm$ 5 | 39 $\pm$ 5 | 37 $\pm$ 5 | 0.027                  | <0.001                 | 0.06                         |
| Crumbliness  | 42 $\pm$ 4 | 27 $\pm$ 4 | 28 $\pm$ 4 | 33 $\pm$ 4 | 31 $\pm$ 4 | 28 $\pm$ 4 | 36 $\pm$ 5 | 30 $\pm$ 4 | 30 $\pm$ 4 | 0.91                   | 0.026                  | 0.21                         |

**Supplement Table 4:** Significant predictors of ER (bread only) and fit statistics of the reduced RSM. (BT: Bread type, ST: Slice thickness, M: Margarine addition), (n=30).

| Source                   | p-value | Coefficient Estimate | Standard Error |
|--------------------------|---------|----------------------|----------------|
| BT                       | < 0.001 | 1.68                 | 0.17           |
| ST                       | < 0.001 | 2.45                 | 0.20           |
| M                        | < 0.001 | 1.34                 | 0.21           |
| M <sup>2</sup>           | 0.011   | -1.06                | 0.36           |
| Fit statistics           | value   |                      |                |
| Model p-value            | < 0.001 |                      |                |
| R <sup>2</sup>           | 0.958   |                      |                |
| Adjusted R <sup>2</sup>  | 0.945   |                      |                |
| Predicted R <sup>2</sup> | 0.917   |                      |                |
| Signal/Noise             | 29.0    |                      |                |

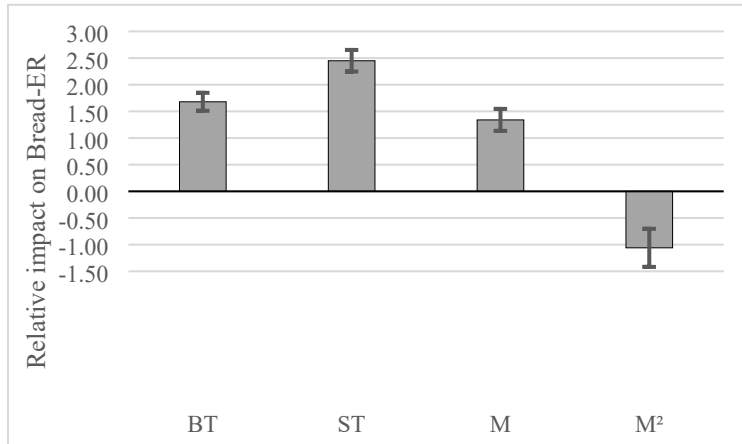

**Supplement Figure 1:** Relative impact of the predictors on ER ('bread only') (n=30). (BT: Bread type, ST: Slice thickness, MA: Margarine addition, error bars represent standard errors).

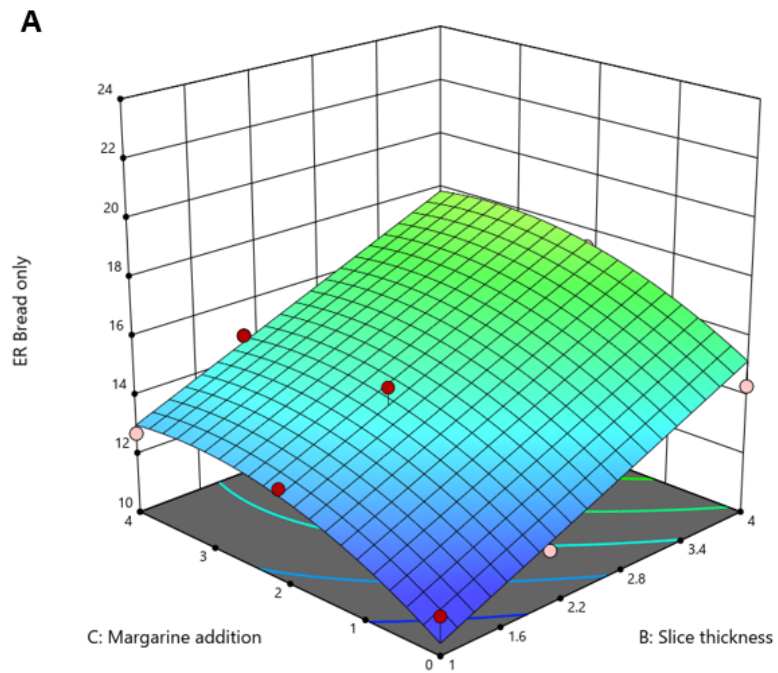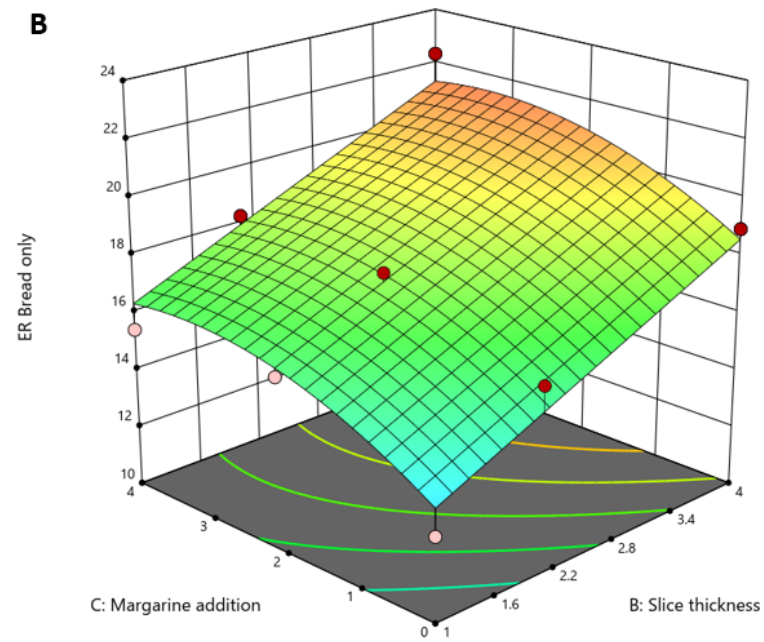

**Supplement Figure 2:** Surface plots of the RSM of ER ('bread only') for wheat bread (A) and sourdough bread (B) (n=30).
